# Supplementary material
Source: Springer Nature journal article supplement (https://www.springermedizin.de/resource/supplementary/12968_2011_2032_MOESM4_ESM.pdf/9581188)

PHILIPS

02/03/2009

15:18:17

TIS0.8 MI 0.8

PP

hospital

S5-1/Adult

FR 61Hz

15cm

2D

72%

C 50

P Low

HGen

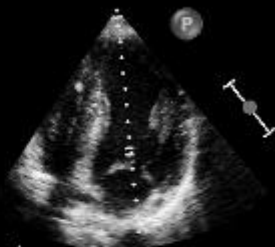

M3

PW

30%

1.6MHz

WF 125Hz

SV4.0mm

8.9cm

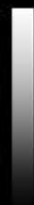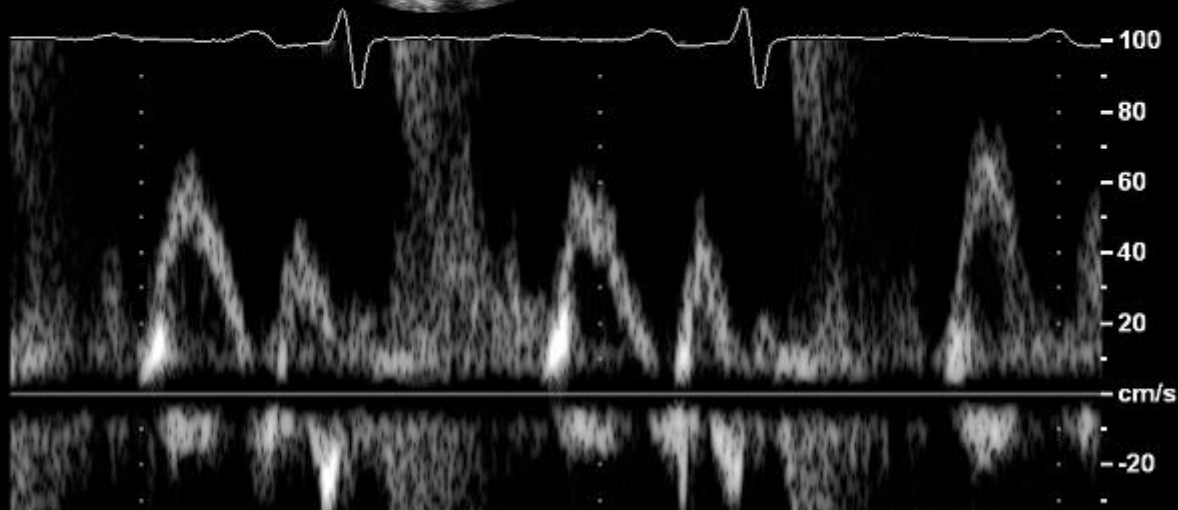

PHILIPS

100mm/s

69bpm

Supplement: MOESM4 [file 9581188]
